# Supplementary material
Source: Springer Nature journal article supplement (https://www.springermedizin.de/resource/supplementary/12885_2013_4510_MOESM3_ESM.pdf/9466424)

# Percent screening rate for each family physician in the intervention group by gender and cluster

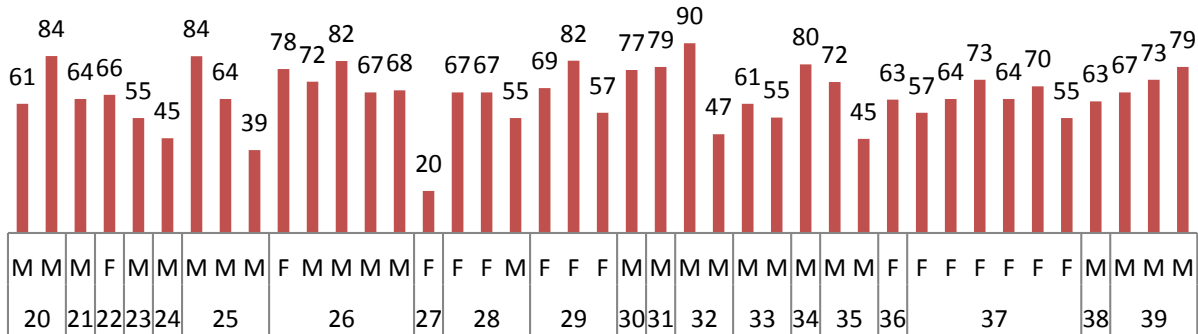

Supplement: MOESM3 [file 9466424]
